# Supplementary material for: A Highly Sensitive SPE Derivatization–UHPLC–MS Approach for Quantitative Profiling of Carotenoid-Derived Dialdehydes from Vegetables
Source: PubMed Central journal article supplement (PMC7722347; doi:10.1021/acs.jafc.9b01749), 2019-05-05

# A Highly Sensitive SPE Derivatization–UHPLC–MS Approach for Quantitative Profiling of Carotenoid-Derived Dialdehydes from Vegetables

Jianing Mi, Kun-Peng Jia, Aparna Balakrishna, Qitong Feng, and Salim Al-Babili\*

King Abdullah University of Science and Technology (KAUST), Biological and Environmental Sciences and Engineering Division, The BioActives Lab, Thuwal 23955-6900, Kingdom of Saudi Arabia.

\* Corresponding author

E-mail address: [salim.babili@kaust.edu.sa](mailto:salim.babili@kaust.edu.sa)

Figure S1. T3-derivatization of carotenoid-derived DIALs. A). Scheme of derivatization of carotenoid-derived DIALs with T3 Reagents; B). Optimization of T3 derivatization conditions of DIALs; C). Comparison of the ionization efficiency of DIALs between with and without derivatization.

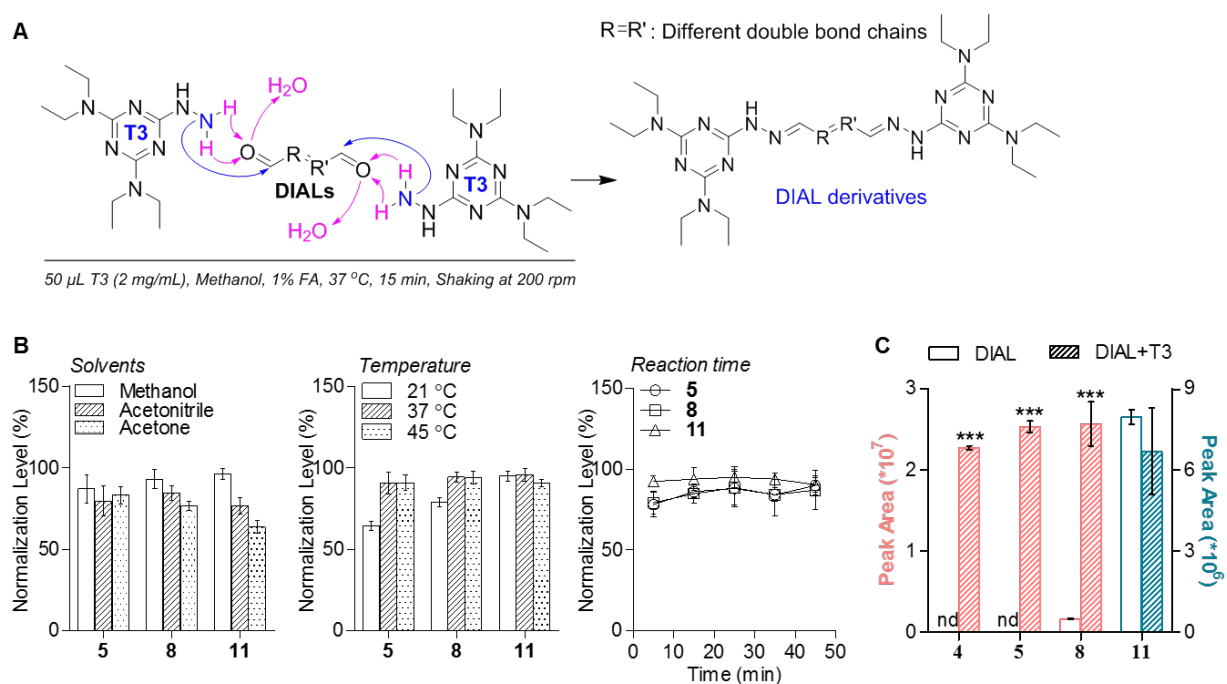

Figure S2. Optimization of T3-derivatized DIALs MS detection.

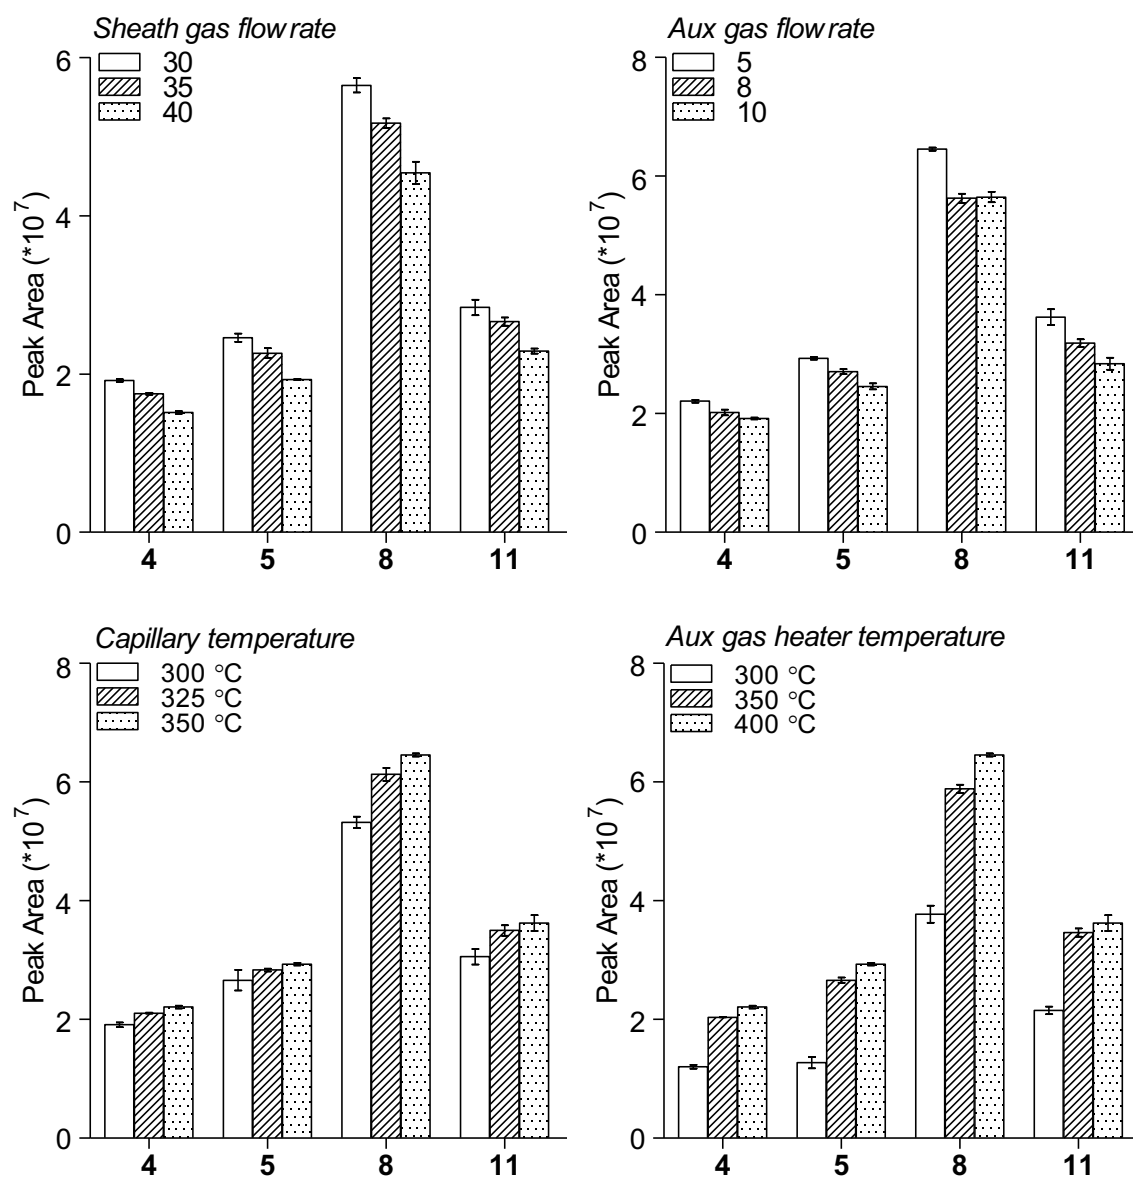

Figure S3. T3-derivatization of apocarotenoids.

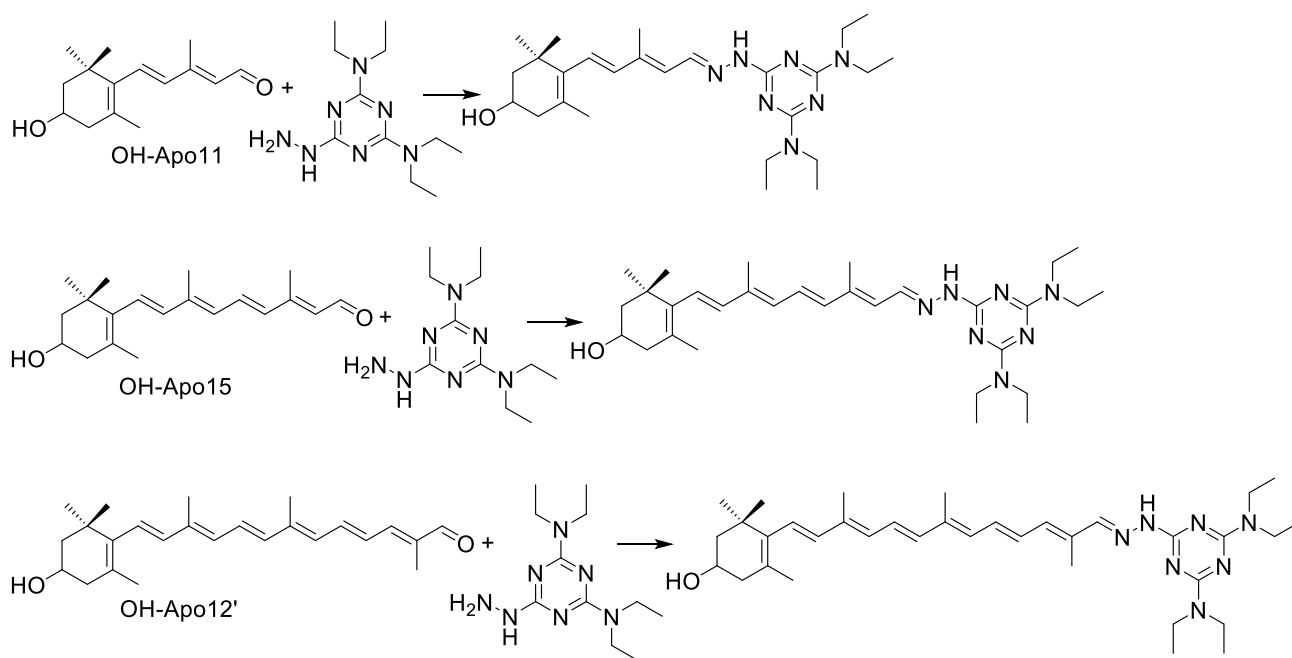

Figure S4. Confirmation of the assignment of endogenous carotenoid-derived DIALs with standards (A) and UHPLC chromatographic retention time rule (B).

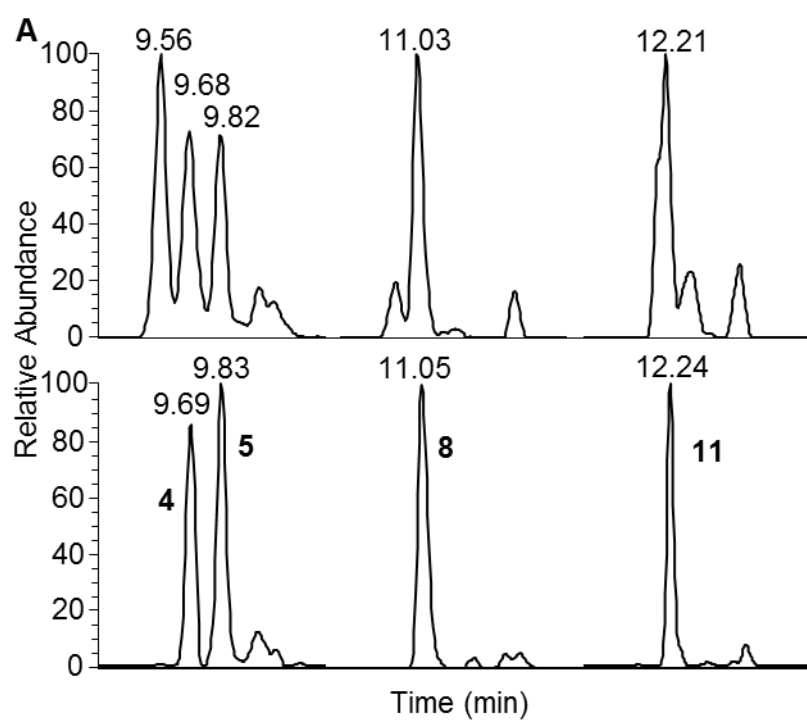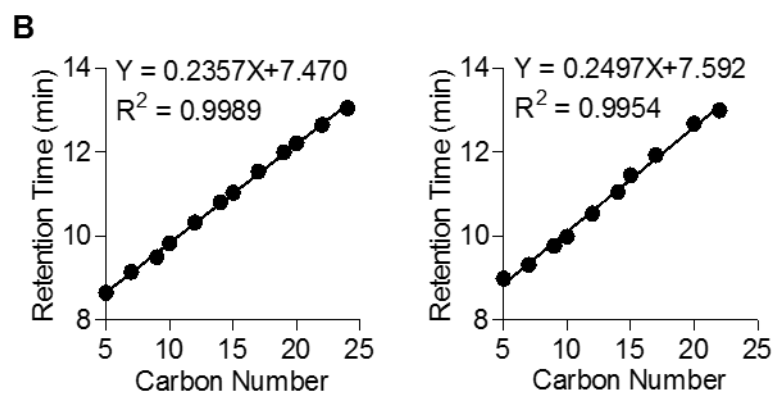

Figure S5. Linearity of the quantitative approach.

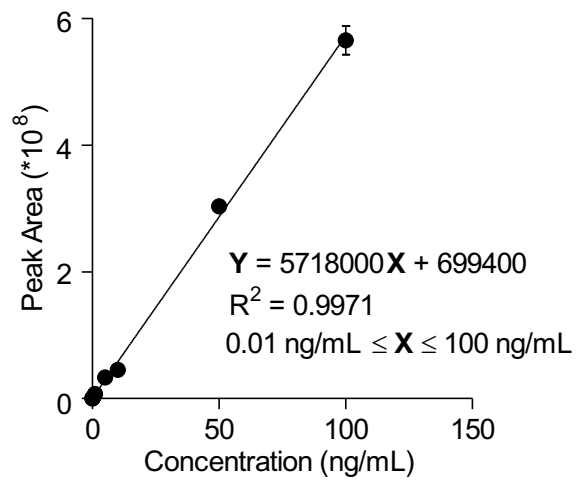

Supplement: JAFC-67-20-5899-s001.pdf [file JAFC-67-20-5899-s001.pdf]
